# Supplementary material
Source: PubMed Central journal article supplement (PMC10121731)
Supplement: NIHMS1866084-supplement-1.pdf [file NIHMS1866084-supplement-1.pdf]

## HCV Testing and Care Cascade among Transgender and Gender Diverse Individuals

Hill L. Wolfe, PhD, MPA; Jaclyn M.W. Hughto, PhD, MPH; Meg Quint, BS; Leila Hashemi, MD; Landon D. Hughes, BA

*American Journal of Preventive Medicine*

**Appendix Table 1.** International Classification of Diseases, Ninth and Tenth Revision (ICD-9 and 10), Clinical Modification (ICD-9-CM; ICD-10-CM) for HCV

| Code Type | Code   |
|-----------|--------|
| ICD-9     | 070.41 |
| ICD-9     | 070.44 |
| ICD-9     | 070.51 |
| ICD-9     | 070.54 |
| ICD-9     | 070.70 |
| ICD-9     | 070.71 |
| ICD-9     | V02.62 |
| ICD-10    | B1711  |
| ICD-10    | B182   |
| ICD-10    | B1710  |
| ICD-10    | B1920  |
| ICD-10    | B1921  |
| ICD-10    | Z22.52 |

**Appendix Table 2.** Current Procedural Terminology (CPT) and Healthcare Common Procedure Coding System (HCPCS) Codes for HCV Tests

| Code Type | Code  |
|-----------|-------|
| CPT       | 86803 |
| CPT       | 80074 |
| CPT       | 86804 |
| HCPCS     | G0472 |
| CPT       | 87902 |
| CPT       | 3266F |
| CPT       | 87520 |
| CPT       | 87521 |
| CPT       | 87522 |

**Appendix Table 3.** National Drug Codes (NDC) for HCV Treatment

| <b>NDC Code</b> | <b>Description</b>    |
|-----------------|-----------------------|
| 00004008694     | Copegus               |
| 54868488800     | Copegus               |
| 00003001101     | Daklinza              |
| 00003021501     | Daklinza              |
| 00003021301     | Daklinza              |
| 61958220101     | Epclusa               |
| 61958180101     | Harvoni               |
| 61958180301     | Harvoni               |
| 51167010003     | Incivek               |
| 51167010001     | Incivek               |
| 72626260101     | Ledipasvir-Sofosbuvir |
| 00527194748     | Lopinavir-Ritonavir   |
| 00074262528     | Mavyret               |
| 00074262580     | Mavyret               |
| 00074262501     | Mavyret               |
| 00074322414     | Moderiba              |
| 00074328256     | Moderiba              |
| 00074322456     | Moderiba              |
| 00074327156     | Moderiba              |
| 00074327114     | Moderiba              |
| 00074323914     | Moderiba              |
| 00074328214     | Moderiba              |
| 00074319716     | Moderiba              |
| 00074323956     | Moderiba              |
| 00074663322     | Norvir                |
| 00074339930     | Norvir                |
| 54569617000     | Norvir                |
| 00074949202     | Norvir                |
| 54569565600     | Norvir                |
| 54569461300     | Norvir                |
| 54868378202     | Norvir                |
| 54569617001     | Norvir                |
| 00074333330     | Norvir                |
| 00074949254     | Norvir                |
| 54868378203     | Norvir                |
| 35356013830     | Norvir                |
| 00074663330     | Norvir                |
| 54868378201     | Norvir                |
| 54569433500     | Norvir                |
| 54569479200     | Norvir                |

|             |                   |
|-------------|-------------------|
| 00074194063 | Norvir            |
| 54868378200 | Norvir            |
| 59676022528 | Olysio            |
| 00004035039 | Pegasys           |
| 54868488700 | Pegasys           |
| 54868488701 | Pegasys           |
| 00004035009 | Pegasys           |
| 00004035730 | Pegasys           |
| 00004035239 | Pegasys           |
| 00004036030 | Pegasys Proclick  |
| 00004036530 | Pegasys Proclick  |
| 00085129101 | Pegintron         |
| 00085127901 | Pegintron         |
| 00085435601 | Pegintron         |
| 00085435501 | Pegintron         |
| 00085435401 | Pegintron         |
| 00085130401 | Pegintron         |
| 00085435301 | Pegintron         |
| 00085136801 | Pegintron         |
| 00085132301 | Pegintron Redipen |
| 54868503601 | Pegintron Redipen |
| 00085137001 | Pegintron Redipen |
| 00085132302 | Pegintron Redipen |
| 00085129702 | Pegintron Redipen |
| 54868503600 | Pegintron Redipen |
| 00085131601 | Pegintron Redipen |
| 00085129701 | Pegintron Redipen |
| 00085137002 | Pegintron Redipen |
| 00085131602 | Pegintron Redipen |
| 64406001502 | Plegridy          |
| 64406001601 | Plegridy          |
| 64406001501 | Plegridy          |
| 64406001101 | Plegridy Pen      |
| 64406001201 | Plegridy Pen      |
| 64406001102 | Plegridy Pen      |
| 00085119403 | Rebetol           |
| 54868503500 | Rebetol           |
| 00085138507 | Rebetol           |
| 00085132704 | Rebetol           |
| 00085131801 | Rebetol           |
| 00085135105 | Rebetol           |
| 00085125802 | Rebetron 1000     |
| 00085123602 | Rebetron 1000     |

|             |                    |
|-------------|--------------------|
| 00085124102 | Rebetron 1000      |
| 00085125801 | Rebetron 1200      |
| 00085124101 | Rebetron 1200      |
| 54569542700 | Rebetron 1200      |
| 00085123601 | Rebetron 1200      |
| 00085125803 | Rebetron 600       |
| 00085123603 | Rebetron 600       |
| 00085124103 | Rebetron 600       |
| 49884007176 | Ribapak            |
| 49884033876 | Ribapak            |
| 49884034076 | Ribapak            |
| 66435010356 | Ribasphere         |
| 66435010156 | Ribasphere         |
| 49884085656 | Ribasphere         |
| 54868452100 | Ribasphere         |
| 66435010456 | Ribasphere         |
| 66435010142 | Ribasphere         |
| 66435010184 | Ribasphere         |
| 66435010170 | Ribasphere         |
| 49884085694 | Ribasphere         |
| 66435010118 | Ribasphere         |
| 66435010216 | Ribasphere         |
| 49884085693 | Ribasphere         |
| 49884085692 | Ribasphere         |
| 66435010756 | Ribasphere Ribapak |
| 66435010899 | Ribasphere Ribapak |
| 66435010656 | Ribasphere Ribapak |
| 66435010556 | Ribasphere Ribapak |
| 66435010799 | Ribasphere Ribapak |
| 66435010856 | Ribasphere Ribapak |
| 66435010699 | Ribasphere Ribapak |
| 66435010599 | Ribasphere Ribapak |
| 16241007076 | Ribatab            |
| 16241006976 | Ribatab            |
| 16241006956 | Ribatab            |
| 16241007056 | Ribatab            |
| 16241033776 | Ribatab            |
| 54738095342 | Ribavirin          |
| 68084017965 | Ribavirin          |
| 00406204616 | Ribavirin          |
| 00781204316 | Ribavirin          |
| 00093722763 | Ribavirin          |
| 00093722777 | Ribavirin          |

|             |           |
|-------------|-----------|
| 49452622102 | Ribavirin |
| 65862020768 | Ribavirin |
| 68382004610 | Ribavirin |
| 68382026028 | Ribavirin |
| 49884004532 | Ribavirin |
| 00406226084 | Ribavirin |
| 59930152304 | Ribavirin |
| 59930152303 | Ribavirin |
| 54868452102 | Ribavirin |
| 54738095384 | Ribavirin |
| 65862029084 | Ribavirin |
| 68084015065 | Ribavirin |
| 59930152302 | Ribavirin |
| 00781204367 | Ribavirin |
| 68382026004 | Ribavirin |
| 63370021955 | Ribavirin |
| 65862029070 | Ribavirin |
| 68382004603 | Ribavirin |
| 62991207701 | Ribavirin |
| 63370021950 | Ribavirin |
| 00406226042 | Ribavirin |
| 54738095016 | Ribavirin |
| 00781517728 | Ribavirin |
| 49452622103 | Ribavirin |
| 68382026009 | Ribavirin |
| 38779025609 | Ribavirin |
| 62991207702 | Ribavirin |
| 00093723281 | Ribavirin |
| 49452622101 | Ribavirin |
| 68382012907 | Ribavirin |
| 54738095256 | Ribavirin |
| 00781204304 | Ribavirin |
| 68382026010 | Ribavirin |
| 68382026012 | Ribavirin |
| 51927167100 | Ribavirin |
| 59930152301 | Ribavirin |
| 54868452103 | Ribavirin |
| 68084017911 | Ribavirin |
| 54738095356 | Ribavirin |
| 54738095370 | Ribavirin |
| 68084015011 | Ribavirin |
| 68382039504 | Ribavirin |
| 65862029018 | Ribavirin |

|             |                        |
|-------------|------------------------|
| 68382039501 | Ribavirin              |
| 54738095156 | Ribavirin              |
| 54738095318 | Ribavirin              |
| 00093722772 | Ribavirin              |
| 68682001906 | Ribavirin              |
| 68382012807 | Ribavirin              |
| 65862029056 | Ribavirin              |
| 00093722758 | Ribavirin              |
| 54868452101 | Ribavirin              |
| 00406226056 | Ribavirin              |
| 62991207703 | Ribavirin              |
| 00406226070 | Ribavirin              |
| 68382026007 | Ribavirin              |
| 68382004628 | Ribavirin              |
| 00781204342 | Ribavirin              |
| 65862029042 | Ribavirin              |
| 68382012707 | Ribavirin              |
| 49452622104 | Ribavirin              |
| 60687042025 | Ritonavir              |
| 60687042095 | Ritonavir              |
| 60687036495 | Ritonavir              |
| 31722059730 | Ritonavir              |
| 65162006106 | Ritonavir              |
| 00054040713 | Ritonavir              |
| 65862068730 | Ritonavir              |
| 68382069606 | Ritonavir              |
| 60687036425 | Ritonavir              |
| 72626270101 | Sofosbuvir-Velpatasvir |
| 61958150301 | Sovaldi                |
| 61958150101 | Sovaldi                |
| 00085434801 | Sylatron               |
| 00085138801 | Sylatron               |
| 00085128702 | Sylatron               |
| 00085131201 | Sylatron               |
| 00085434901 | Sylatron               |
| 00085434701 | Sylatron               |
| 00085138802 | Sylatron 4-Pack        |
| 00085128703 | Sylatron 4-Pack        |
| 00085131202 | Sylatron 4-Pack        |
| 00074308228 | Technivie              |
| 00085031402 | Victrelis              |
| 00085031403 | Victrelis              |
| 00074309328 | Viekira Pak            |

|             |             |
|-------------|-------------|
| 00074309301 | Viekira Pak |
| 00074006328 | Viekira XR  |
| 00187000714 | Virazole    |
| 53095000714 | Virazole    |
| 00187000701 | Virazole    |
| 53095000701 | Virazole    |
| 61958240101 | Vosevi      |
| 00006307402 | Zepatier    |
| 00006307401 | Zepatier    |

**Appendix Table 4.** Demographic Characteristics of Entire Sample, 2001-2019

| Characteristic                | TOTAL<br>(N=10,507,834) |       | TFN<br>(n=9,940) |       | TMN<br>(n=18,882) |       | TGD<br>Unclassified<br>(n=9,619) |       | Cis Women<br>(n=5,215,258) |       | Cis Men<br>(n=5,251,750) |       | Cis<br>Unclassified<br>(n=2,385) |       |
|-------------------------------|-------------------------|-------|------------------|-------|-------------------|-------|----------------------------------|-------|----------------------------|-------|--------------------------|-------|----------------------------------|-------|
|                               | n                       | %     | n                | %     | n                 | %     | n                                | %     | n                          | %     | n                        | %     | n                                | %     |
| <b>Race</b>                   |                         |       |                  |       |                   |       |                                  |       |                            |       |                          |       |                                  |       |
| Asian                         | 404,491                 | 3.85  | 271              | 2.73  | 494               | 2.62  | 250                              | 2.60  | 193,236                    | 3.71  | 210,189                  | 4.00  | 51                               | 2.14  |
| Black                         | 842,448                 | 8.02  | 779              | 7.84  | 1,527             | 8.09  | 711                              | 7.39  | 455,025                    | 8.72  | 384,266                  | 7.32  | 140                              | 5.87  |
| Hispanic                      | 1,044,613               | 9.94  | 773              | 7.78  | 1,645             | 8.71  | 827                              | 8.60  | 499,807                    | 9.58  | 541,439                  | 10.31 | 122                              | 5.12  |
| Unknown                       | 2,683,184               | 25.54 | 1,898            | 19.09 | 3,038             | 16.09 | 2,185                            | 22.72 | 1,342,411                  | 25.74 | 1,332,250                | 25.37 | 1,402                            | 58.78 |
| White                         | 5,533,098               | 52.66 | 6,219            | 62.57 | 12,178            | 64.50 | 5,646                            | 58.70 | 2,724,779                  | 52.25 | 2,783,606                | 53.00 | 670                              | 28.09 |
| <b>Region</b>                 |                         |       |                  |       |                   |       |                                  |       |                            |       |                          |       |                                  |       |
| Midwest                       | 2,592,455               | 24.67 | 2,393            | 24.07 | 4,260             | 2.56  | 2,569                            | 26.71 | 1,283,161                  | 24.60 | 1,299,653                | 24.75 | 419                              | 17.57 |
| South                         | 4,630,240               | 44.06 | 3,676            | 36.98 | 8,206             | 43.46 | 3,311                            | 34.42 | 2,305,473                  | 44.21 | 2,308,518                | 43.96 | 1,056                            | 44.28 |
| West                          | 2,147,321               | 20.44 | 2,788            | 28.05 | 4,613             | 24.43 | 2,594                            | 26.97 | 1,066,734                  | 20.45 | 1,069,969                | 20.37 | 623                              | 26.12 |
| Northeast                     | 1,028,881               | 9.79  | 1,072            | 10.78 | 1,783             | 9.44  | 1,125                            | 11.70 | 516,655                    | 9.91  | 507,978                  | 9.67  | 268                              | 11.24 |
| Unknown                       | 108,937                 | 1.04  | 11               | 0.11  | 20                | 0.11  | 20                               | 0.21  | 43,235                     | 0.83  | 65,632                   | 1.25  | 19                               | 0.80  |
| <b>Enrollment Age (years)</b> | 35.59                   | 21.35 | 39.90            | 18.37 | 33.27             | 15.40 | 28.45                            | 19.11 | 36.33                      | 21.82 | 34.88                    | 20.87 | 29.60                            | 18.87 |

*Cis*, Cisgender; *TGD*, Transgender and gender diverse; *TFN*, Trans feminine and non-binary; *TMN*, Trans masculine and non-binary. *Note*: Demographic characteristics among entire sample stratified by gender in Optum’s de-identified Clinformatics® Data Mart Database from 2001-2019. Race: Asian, Black, and White are non-Hispanic. Enrollment Age: represented in years; Mean represented in n column, standard deviation in percent column.



**Appendix Table 5.** Demographic Characteristics of People who Inject Drugs, 2001-2019

| Characteristic                    | TOTAL<br>(N=5,195) |       | TFN<br>(n=26) |       | TMN<br>(n=72) |       | TGD<br>Unclassified<br>(n=12) |       | Cis Women<br>(n=2,636) |       | Cis Men<br>(n=2,448) |       | Cis<br>Unclassified<br>(n=1) |    |
|-----------------------------------|--------------------|-------|---------------|-------|---------------|-------|-------------------------------|-------|------------------------|-------|----------------------|-------|------------------------------|----|
|                                   | n                  | %     | n             | %     | n             | %     | n                             | %     | n                      | %     | n                    | %     | n                            | %  |
| <b>Race</b>                       |                    |       |               |       |               |       |                               |       |                        |       |                      |       |                              |    |
| Asian                             | 123                | 2.37  | 0             | 0.00  | 1             | 1.39  | 0                             | 0.00  | 63                     | 2.39  | 59                   | 2.41  | --                           | -- |
| Black                             | 525                | 10.11 | 3             | 11.54 | 8             | 11.11 | 2                             | 16.67 | 307                    | 11.65 | 204                  | 8.33  | --                           | -- |
| Hispanic                          | 428                | 8.24  | 2             | 7.69  | 7             | 9.72  | 3                             | 25.00 | 205                    | 7.78  | 211                  | 8.62  | --                           | -- |
| Unknown                           | 636                | 12.24 | 2             | 7.69  | 4             | 5.56  | 1                             | 8.33  | 310                    | 11.76 | 319                  | 13.03 | --                           | -- |
| White                             | 3483               | 67.05 | 19            | 73.08 | 52            | 72.22 | 6                             | 50.00 | 1,751                  | 66.43 | 1,655                | 67.61 | --                           | -- |
| <b>Region</b>                     |                    |       |               |       |               |       |                               |       |                        |       |                      |       |                              |    |
| Midwest                           | 1536               | 29.57 | 10            | 38.46 | 21            | 29.17 | 3                             | 25.00 | 750                    | 28.45 | 752                  | 30.72 | --                           | -- |
| South                             | 2151               | 41.41 | 9             | 34.62 | 36            | 50.00 | 3                             | 25.00 | 1,138                  | 43.17 | 964                  | 39.38 | --                           | -- |
| West                              | 861                | 16.57 | 7             | 26.92 | 12            | 16.67 | 3                             | 25.00 | 458                    | 17.37 | 381                  | 15.56 | --                           | -- |
| Northeast                         | 639                | 12.30 | 0             | 0.00  | 3             | 4.17  | 3                             | 25.00 | 284                    | 10.77 | 349                  | 14.26 | --                           | -- |
| Unknown                           | 8                  | 0.15  | 0             | 0.00  | 0             | 0.00  | 0                             | 0.00  | 6                      | 0.23  | 2                    | 0.08  | --                           | -- |
| <b>Enrollment Age<br/>(years)</b> | 48.62              | 20.14 | 48.19         | 20.63 | 42.86         | 16.84 | 29.08                         | 17.04 | 50.91                  | 19.49 | 46.43                | 20.62 | --                           | -- |

*Cis*, Cisgender; *TGD*, Transgender and gender diverse; *TFN*, Trans feminine and non-binary; *TMN*, Trans masculine and non-binary. *Note*: Demographic characteristics among people who inject drugs stratified by gender in Optum’s de-identified Clinformatics® Data Mart Database from 2001-2019. Cis Unclassified were not reported for confidentiality since only one individual met this criterion. Race: Asian, Black, and White categories are non-Hispanic. Enrollment Age: age at first documentation of IDU represented in years; Mean represented in n column, standard deviation in percent column.

**Appendix Table 6.** Unadjusted Prevalence of Hepatitis C virus (HCV) Testing, 2001-2019

|                         | Entire Sample (N=10,507,834) |          |                 |                         | People who inject drugs (N=5,195) |          |                 |
|-------------------------|------------------------------|----------|-----------------|-------------------------|-----------------------------------|----------|-----------------|
| Gender Minority Status  | n                            | %        | <i>P</i>        | Gender Minority Status  | n                                 | %        | <i>P</i>        |
| <b>TGD</b>              |                              |          |                 | <b>TGD</b>              |                                   |          |                 |
| No HCV Testing          | 32,741                       | 85.17    | <b>***</b>      | No HCV Testing          | 96                                | 87       | *               |
| HCV Testing             | 5,700                        | 14.83    |                 | HCV Testing             | 14                                | 13       |                 |
| <b>Cis</b>              |                              |          |                 | <b>Cis</b>              |                                   |          |                 |
| No HCV Testing          | 10,078,798                   | 96.27    |                 | No HCV Testing          | 4,704                             | 93       |                 |
| HCV Testing             | 390,595                      | 3.73     |                 | HCV Testing             | 381                               | 7        |                 |
| <b>Gender Subgroups</b> | <b>n</b>                     | <b>%</b> | <b><i>P</i></b> | <b>Gender Subgroups</b> | <b>n</b>                          | <b>%</b> | <b><i>P</i></b> |
| <b>TFN</b>              |                              |          |                 | <b>TFN</b>              |                                   |          |                 |
| No HCV Testing          | 8,233                        | 82.83    | <b>***</b>      | No HCV Testing          | 24                                | 92       | *               |
| HCV Testing             | 1,707                        | 17.17    |                 | HCV Testing             | 2                                 | 8        |                 |
| <b>TMN</b>              |                              |          |                 | <b>TMN</b>              |                                   |          |                 |
| No HCV Testing          | 15,447                       | 81.81    |                 | No HCV Testing          | 60                                | 83       |                 |
| HCV Testing             | 3,435                        | 18.19    |                 | HCV Testing             | 12                                | 17       |                 |
| <b>TGD Unclassified</b> |                              |          |                 | <b>TGD Unclassified</b> |                                   |          |                 |
| No HCV Testing          | 9,061                        | 94.20    |                 | No HCV Testing          | 12                                | 100      |                 |
| HCV Testing             | 558                          | 5.80     |                 | HCV Testing             | 0                                 | 0        |                 |
| <b>Cis Women</b>        |                              |          |                 | <b>Cis Women</b>        |                                   |          |                 |
| No HCV Testing          | 4,993,885                    | 95.76    |                 | No HCV Testing          | 2,441                             | 93       |                 |
| HCV Testing             | 221,373                      | 4.24     |                 | HCV Testing             | 195                               | 7        |                 |
| <b>Cis Men</b>          |                              |          |                 | <b>Cis Men</b>          |                                   |          |                 |
| No HCV Testing          | 5,082,578                    | 96.78    |                 | No HCV Testing          | 2,262                             | 92       |                 |
| HCV Testing             | 169,172                      | 3.22     |                 | HCV Testing             | 186                               | 8        |                 |
| <b>Cis Unclassified</b> |                              |          |                 | <b>Cis Unclassified</b> |                                   |          |                 |
| No HCV Testing          | 2,335                        | 97.90    |                 | No HCV Testing          | 1                                 | 100      |                 |
| HCV Testing             | 50                           | 2.10     |                 | HCV Testing             | 0                                 | 0        |                 |

*Cis*, Cisgender; *P*, P-value; *TGD*, Transgender and gender diverse; *TFN*, Trans feminine and non-binary; *TMN*, Trans masculine and non-binary. Bolded values represent significance at  $p < 0.05$ . Note: Unadjusted prevalence of hepatitis C virus (HCV) testing among entire sample and people who inject drugs stratified by gender in Optum's de-identified Clinformatics® Data Mart Database from 2001-2019. P-values were derived from Fisher's exact test for gender subgroups among people who inject drugs;  $\chi^2$  tests were used for all other analyses. Boldface indicates statistical significance (\* $p \leq 0.05$ , \*\* $p \leq 0.01$ , \*\*\* $p \leq 0.001$ ).

**Appendix Table 7.** Adjusted Multivariable Models of Gender and Hepatitis C virus (HCV) Testing, 2001-2019

| Entire Sample (N=10,507,834)  |             |           |      | People who inject drugs (N=5,195) |             |           |      |
|-------------------------------|-------------|-----------|------|-----------------------------------|-------------|-----------|------|
|                               | HCV Testing |           |      |                                   | HCV Testing |           |      |
| Characteristic                | aOR         | 95% CI    | P    | Characteristic                    | aOR         | 95% CI    | P    |
| <b>PRIMARY PREDICTOR</b>      |             |           |      | <b>PRIMARY PREDICTOR</b>          |             |           |      |
| <b>Gender</b>                 |             |           |      | <b>Gender</b>                     |             |           |      |
| Cis Women                     | Ref.        | --        | --   | Cis Women                         | Ref.        | --        | --   |
| Cis Men                       | 0.78        | 0.78-0.79 | ***  | Cis Men                           | 0.92        | 0.74-1.14 | 0.45 |
| Cis Unclassified              | 0.81        | 0.61-1.09 | 0.16 | Cis Unclassified                  | --          | --        | --   |
| TFN                           | 2.63        | 2.49-2.79 | ***  | TFN                               | 1.05        | 0.24-4.53 | 0.95 |
| TMN                           | 2.67        | 2.56-2.78 | ***  | TMN                               | 2.21        | 1.16-4.23 | *    |
| TGD Unclassified              | 1.16        | 1.07-1.27 | ***  | TGD Unclassified                  | --          | --        | --   |
| <b>CONTROL VARIABLES</b>      |             |           |      | <b>CONTROL VARIABLES</b>          |             |           |      |
| <b>Race</b>                   |             |           |      | <b>Race</b>                       |             |           |      |
| White                         | Ref.        | --        | --   | White                             | Ref.        | --        | --   |
| Asian                         | 1.46        | 1.45-1.49 | ***  | Asian                             | 1.22        | 0.64-2.32 | 0.54 |
| Black                         | 1.27        | 1.26-1.29 | ***  | Black                             | 1.52        | 1.10-2.10 | **   |
| Hispanic                      | 1.26        | 1.25-1.27 | ***  | Hispanic                          | 1.07        | 0.74-1.56 | 0.72 |
| Unknown                       | 0.66        | 0.66-0.67 | ***  | Unknown                           | 0.87        | 0.62-1.23 | 0.43 |
| <b>Region</b>                 |             |           |      | <b>Region</b>                     |             |           |      |
| Midwest                       | Ref.        | --        | --   | Midwest                           | Ref.        | --        | --   |
| South                         | 1.31        | 1.30-1.32 | ***  | South                             | 1.15        | 0.89-1.50 | 0.29 |
| West                          | 1.00        | 0.98-1.01 | 0.38 | West                              | 1.05        | 0.75-1.48 | 0.78 |
| Northeast                     | 1.78        | 1.76-1.80 | ***  | Northeast                         | 2.12        | 1.54-2.93 | ***  |
| Unknown                       | 0.14        | 0.13-0.15 | ***  | Unknown                           | --          | --        | --   |
| <b>Enrollment Age (years)</b> | 1.01        | 1.01-1.02 | ***  | <b>Age of First IDU (years)</b>   | 0.98        | 0.97-0.99 | ***  |
| <b>Enrollment Months</b>      | 1.02        | 1.02-1.02 | ***  | <b>Months Past IDU</b>            | 0.99        | 0.99-1.00 | 0.12 |
| <b>Enrollment Year</b>        | 1.06        | 1.06-1.06 | ***  | <b>First Year of IDU</b>          | 1.03        | 1.01-1.05 | **   |

aOR, Adjusted odds ratio; CI, Confidence interval; Cis, Cisgender; IDU, Injection drug use; P, P-value; TFN, Trans feminine and non-binary; TMN, Trans masculine and non-binary. Note: Adjusted multivariable models examining the association between gender and hepatitis C virus (HCV) testing among entire sample and people who inject drugs in Optum's de-identified Clinformatics® Data Mart Database from 2001-2019. Variables with missing data indicate dropped observations from perfect predictions. Outcome: Hepatitis C virus (HCV) diagnosis (ref=no HCV diagnosis). Model adjusted for all listed demographic and enrollment characteristics. Boldface indicates statistical significance (\*p<0.05, \*\*p<0.01, \*\*\*p<0.001).

**Appendix Table 8.** Adjusted Multivariable Analyses of Gender and Hepatitis C virus (HCV) Care Cascade, 2001-2019 (N=13,134)

|                          | Specialist Follow-Up |           |      | HCV-Specific Procedure |           |      | HCV Antiviral Prescription |           |      |
|--------------------------|----------------------|-----------|------|------------------------|-----------|------|----------------------------|-----------|------|
|                          | aOR                  | 95% CI    | P    | aOR                    | 95% CI    | P    | aOR                        | 95% CI    | P    |
| <b>PRIMARY PREDICTOR</b> |                      |           |      |                        |           |      |                            |           |      |
| <b>Gender</b>            |                      |           |      |                        |           |      |                            |           |      |
| Cis Women                | Ref.                 | --        | --   | Ref.                   | --        | --   | Ref.                       | --        | --   |
| Cis Men                  | 0.93                 | 0.85-1.01 | 0.08 | 1.04                   | 0.94-1.14 | 0.48 | 1.17                       | 1.09-1.26 | ***  |
| Cis Unclassified         | 0.21                 | 0.03-1.62 | 0.13 | --                     | --        | --   | --                         | --        | --   |
| TFN                      | 1.72                 | 0.94-3.14 | 0.08 | 2.69                   | 1.08-6.74 | *    | 1.56                       | 0.98-2.47 | 0.06 |
| TMN                      | 1.13                 | 0.52-2.43 | 0.76 | --                     | --        | --   | 0.83                       | 0.46-1.51 | 0.54 |
| TGD Unclassified         | 0.65                 | 0.29-1.48 | 0.31 | 1.70                   | 0.50-5.71 | 0.39 | 1.78                       | 0.81-3.88 | 0.15 |
| <b>CONTROL VARIABLES</b> |                      |           |      |                        |           |      |                            |           |      |
| <b>Race</b>              |                      |           |      |                        |           |      |                            |           |      |
| White                    | Ref.                 | --        | --   | Ref.                   | --        | --   | Ref.                       | --        | --   |
| Asian                    | 0.65                 | 0.52-0.81 | ***  | 0.81                   | 0.61-1.06 | 0.12 | 0.81                       | 0.66-1.01 | 0.06 |
| Black                    | 1.01                 | 0.89-1.14 | 0.93 | 1.26                   | 1.08-1.47 | **   | 1.07                       | 0.96-1.18 | 0.24 |
| Hispanic                 | 0.82                 | 0.72-0.94 | **   | 1.03                   | 0.88-1.21 | 0.73 | 1.05                       | 0.93-1.18 | 0.40 |
| Unknown                  | 0.91                 | 0.81-1.02 | 0.10 | 0.88                   | 0.77-1.01 | 0.06 | 1.10                       | 0.99-1.23 | 0.07 |
| <b>Region</b>            |                      |           |      |                        |           |      |                            |           |      |
| Midwest                  | Ref.                 | --        | --   | Ref.                   | --        | --   | Ref.                       | --        | --   |
| South                    | 1.18                 | 1.04-1.32 | **   | 0.79                   | 0.68-0.91 | ***  | 0.97                       | 0.88-1.08 | 0.61 |
| West                     | 0.44                 | 0.38-0.50 | ***  | 0.65                   | 0.55-0.76 | ***  | 0.79                       | 0.71-0.89 | ***  |
| Northeast                | 1.25                 | 1.05-1.48 | **   | 1.02                   | 0.83-1.26 | 0.82 | 0.85                       | 0.74-0.98 | *    |
| Unknown                  | 0.57                 | 0.20-1.60 | 0.28 | 1.01                   | 0.23-4.52 | 0.99 | 0.42                       | 0.13-1.34 | 0.14 |
| <b>Index Age (years)</b> | 1.01                 | 1.00-1.01 | ***  | 1.00                   | 1.00-1.01 | 0.16 | 1.00                       | 0.99-1.00 | **   |
| <b>Months Past Index</b> | 1.01                 | 1.01-1.01 | ***  | 1.01                   | 1.01-1.01 | ***  | 1.01                       | 1.01-1.01 | ***  |
| <b>Index Year</b>        | 0.95                 | 0.94-0.96 | ***  | 0.96                   | 0.95-0.97 | ***  | 1.04                       | 1.03-1.05 | ***  |

aOR, Adjusted odds ratio; CI, Confidence interval; Cis, Cisgender; IDU, Injection drug use; P, P-value; TFN, Trans feminine and non-binary; TMN, Trans masculine and non-binary. Note: Adjusted multivariable analyses examining the association between gender and each step of the hepatitis C virus (HCV) care cascade among individuals with chronic HCV in Optum's de-identified Clinformatics® Data Mart Database from 2001-2019 (N=13,134). Outcomes based on yes=1 or no=0 for each care cascade step. Model adjusted for all listed demographic and enrollment characteristics. Index signifies the date of initial HCV test. In our second model, results are null because 100% of TMN had an HCV-specific procedure. Boldface indicates statistical significance (\*p≤0.05, \*\*p≤0.01, \*\*\*p≤0.001).
